# Supplementary material for: Tunable transport mode of polaron in polarized Janus MoSSe few-layer structures: a constrained density functional theory study
Source: Royal Society of Chemistry journal article supplement (doi:10.1039/d4dt02909g), 2025-01-01
Supplement: d4dt02909g1.pdf [file d4dt02909g1.pdf]

## Supporting Information

### Tunable Transport Mode of Polaron in Polarized Janus MoSSe Few-Layers: A Constrained Density Functional Theory Study

Hong-Shun He<sup>1,2</sup>, Yun-Bo Li<sup>1,2</sup>, Jifeng Luo<sup>1,2</sup>, Qingxia Ge<sup>1,2</sup>, Jian Wu<sup>3</sup>, Daifeng Zou<sup>1,2</sup>, Ying  
Xu<sup>1,2</sup>, and Wen-Jin Yin<sup>1,2\*</sup>

<sup>1</sup>School of Physics and Electronic Science, Hunan University of Science and Technology, Xiangtan  
411201, China

<sup>2</sup>Key Laboratory of Intelligent Sensors and Advanced Sensing Materials of Hunan Province, Hunan  
University of Science and Technology, Xiangtan 411201, China

<sup>3</sup>School of Physics and Materials, Nanchang University, Nanchang 330031, China

\*Corresponding Emails: [ywj@hnust.edu.cn](mailto:ywj@hnust.edu.cn)

#### S1: SeMoS/SMoSe combination

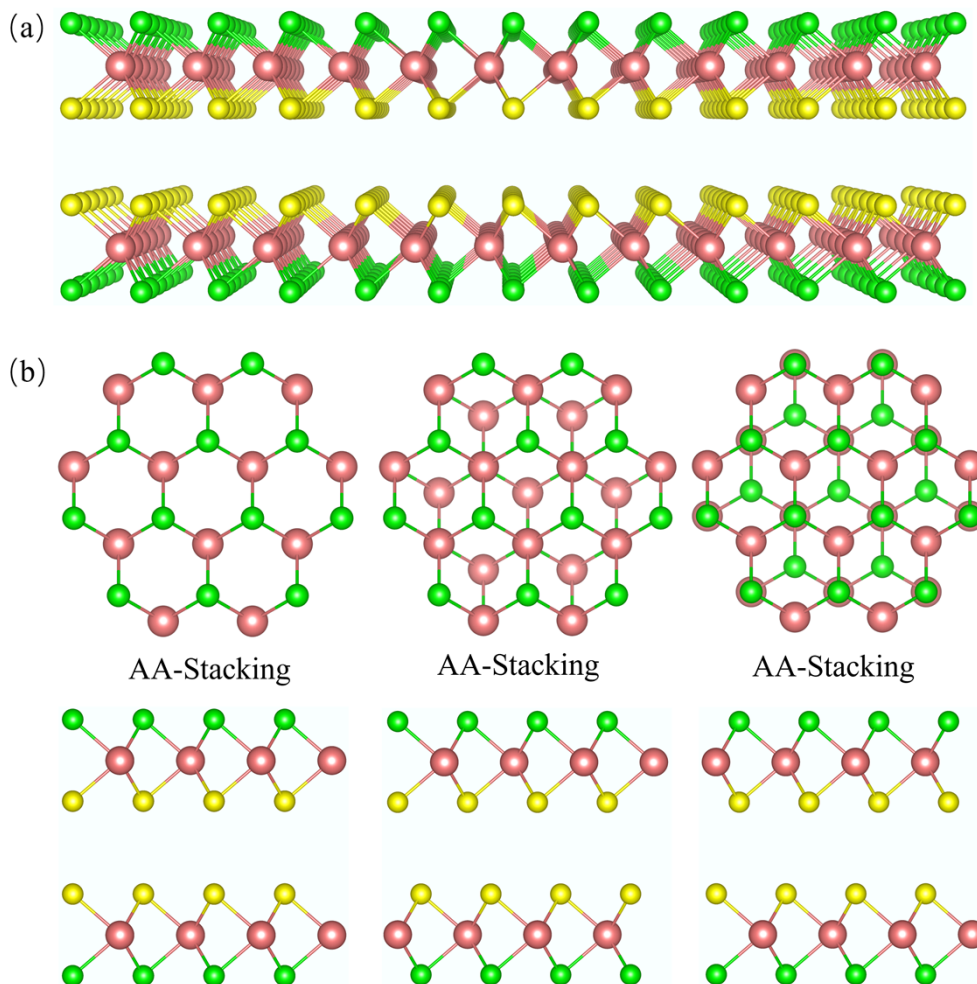

**SI-Fig. 1.** (Color online) (a) The structure of the SeMoS/SMoSe heterostructure. (b) The top and side views of the AA-, AB-, and AC-stackings of the SeMoS/SMoSe heterostructure.

**S2: Delocalized and localized states of electron in two-layer heterostructures**

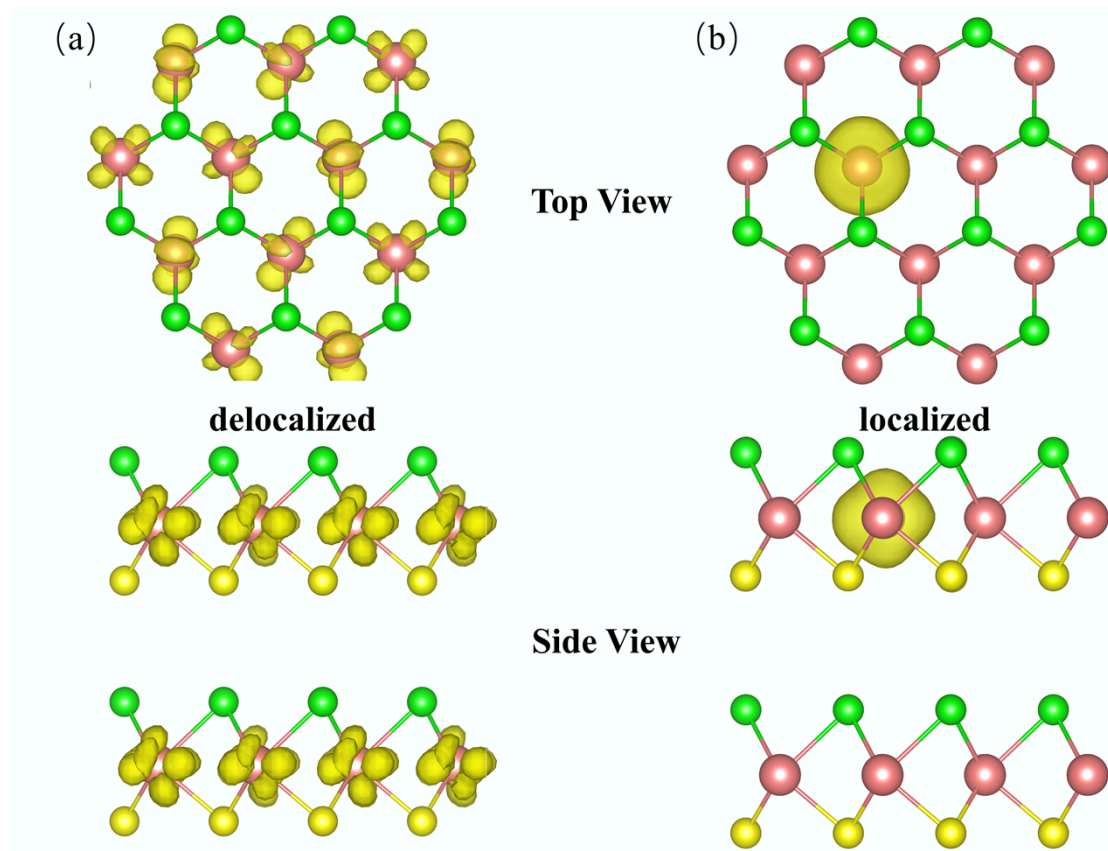

**SI-Fig. 2.** (Color online) (a) Delocalized states of electron in two-layer heterostructures. (b) Localized states of the small electron polaron in two-layer heterostructures.

**Table S1.** The formation energy of electrons and hole polarons varies with the size of the supercell of MoSSe monolayer .

| <b>System</b>          | $E_{pol}(e)$<br>(eV) | $E_{pol}(h)$<br>(S)(eV) | $E_{pol}(h)$<br>(Se)(eV) |
|------------------------|----------------------|-------------------------|--------------------------|
| <b>MoSSe(3*3)</b><br>) | 0.30                 | 1.45                    | 1.33                     |
| <b>MoSSe(4*4)</b><br>) | 0.34                 | 1.38                    | 1.27                     |
| <b>MoSSe(5*5)</b><br>) | 0.35                 | 1.41                    | 1.33                     |
| <b>MoSSe(6*6)</b><br>) | 0.38                 | 1.49                    | 1.38                     |

**Table S2.** The polaron formation energy of the MoS<sub>2</sub> and MoSSe monolayers.

| <b>System</b>          | <b>Polaron</b>   | <b><math>E_{pot}</math> (eV)</b> | <b><math>E_{el}</math> (eV)</b> | <b><math>E_{st}</math> (eV)</b> |
|------------------------|------------------|----------------------------------|---------------------------------|---------------------------------|
| <b>MoS<sub>2</sub></b> | <i>Electron</i>  | 0.33                             | 0.35                            | 0.02                            |
|                        | <i>Hole</i>      | 1.37                             | 1.43                            | 0.06                            |
| <b>MoSSe</b>           | <i>Electron</i>  | 0.35                             | 0.38                            | 0.03                            |
|                        | <i>Hole (S)</i>  | 1.41                             | 1.46                            | 0.05                            |
|                        | <i>Hole (Se)</i> | 1.33                             | 1.48                            | 0.15                            |
